# Supplementary material for: Ameliorating Effect on Glycolipid Metabolism of Spirulina Functional Formulation Combination from Traditional Chinese Medicine
Source: Hindawi journal article supplement (doi:10.1155/2022/3910116), 2022-01-01
Supplement: f1 [file 3910116.f1.zip]

Table S3 Representative MS fragments of major compounds of SGCG.

| Name                         | mz       | Formula                                         | KEGG   | Type                                | Class                               |
|------------------------------|----------|-------------------------------------------------|--------|-------------------------------------|-------------------------------------|
| L-Isoleucine                 | 132.1015 | C <sub>6</sub> H <sub>13</sub> NO <sub>2</sub>  | C00407 | [M+H] <sup>+</sup>                  | Carboxylic acids and derivatives    |
| 8-O-Acetylharpagide          | 387.1223 | C <sub>17</sub> H <sub>26</sub> O <sub>11</sub> | NULL   | [M-H <sub>2</sub> O-H] <sup>-</sup> | Terpenoids                          |
| L-Glutamic acid              | 148.0600 | C <sub>5</sub> H <sub>9</sub> NO <sub>4</sub>   | C00025 | [M+H] <sup>+</sup>                  | Carboxylic acids and derivatives    |
| L-Malic acid                 | 133.0130 | C <sub>4</sub> H <sub>6</sub> O <sub>5</sub>    | C00149 | [M-H] <sup>-</sup>                  | Hydroxy acids and derivatives       |
| Niacinamide                  | 123.0555 | C <sub>6</sub> H <sub>6</sub> N <sub>2</sub> O  | C00153 | [M+H] <sup>+</sup>                  | Pyridines and derivatives           |
| Piperidine                   | 86.0964  | C <sub>5</sub> H <sub>11</sub> N                | C01746 | [M+H] <sup>+</sup>                  | Piperidines                         |
| 3-Hydroxymethylglutaric acid | 145.0475 | C <sub>6</sub> H <sub>10</sub> O <sub>5</sub>   | C03761 | [M+H-H <sub>2</sub> O] <sup>+</sup> | Fatty Acyls                         |
| L-Tyrosine                   | 182.0825 | C <sub>9</sub> H <sub>11</sub> NO <sub>3</sub>  | C00082 | [M+H] <sup>+</sup>                  | Carboxylic acids and derivatives    |
| Sarcosine                    | 90.0558  | C <sub>3</sub> H <sub>7</sub> NO <sub>2</sub>   | C00213 | [M+H] <sup>+</sup>                  | Carboxylic acids and derivatives    |
| Aniline                      | 94.0458  | C <sub>6</sub> H <sub>7</sub> N                 | C00292 | [M+H] <sup>+</sup>                  | Benzene and substituted derivatives |
