# Supplementary material for: Ameliorating Effect on Glycolipid Metabolism of Spirulina Functional Formulation Combination from Traditional Chinese Medicine
Source: Hindawi journal article supplement (doi:10.1155/2022/3910116), 2022-01-01
Supplement: f1 [file 3910116.f1.zip]

**Table S1** Primer sequences.

| Primer name    | Forward primer sequence         | Reverse primer sequence         |
|----------------|---------------------------------|---------------------------------|
| ACC            | 5'-GAATCTCCTGGTGACAATGCTTATT-3' | 5'-GGTCTTGCTGAGTTGGGTAGCT-3'    |
| SCD1           | 5'-GGGTGCCGTGGGCGA-3'           | 5'-ACTCAGAAGCCCAAAGCTCAG-3'     |
| FOXP3          | 5'-CCCCTCTAGCAGTCCACTTCA-3'     | 5'-AAGTTGCCGGGAGAGCTGAAT-3'     |
| NF- $\kappa$ B | 5'-GAGCAACCAAAACAGAGGGG-3'      | 5'-GGGTAGGATTTCTTGTTCTTCTCAC-3' |
| STAT5          | 5'-CACTCCTGTACTTGGTTCGTCA-3'    | 5'-CCAGGTCAAACCTCGCCATCT-3'     |
| AMPK- $\alpha$ | 5'-AAGCCGACCCAATGACATCA-3'      | 5'-CTTCCTTCGTACACGCAAAT-3'      |
| IL-2R          | 5'-GTTGCACAAAGCCCAAGGTG-3'      | 5'-AAGGCGAGCCCACTTCCTTAC-3'     |
| GLUT-4         | 5'-CCTGCCCCGAAAGAGTCTAAAGC-3'   | 5'-ACTAAGAGCACCGAGACCAACG-3'    |
| GSK-3 $\beta$  | 5'-TGCGGGAGAACTTAATGCTG-3'      | 5'-TGCTGCCATCTTTATCTCTGCT-3'    |
| $\beta$ -actin | 5'-TGTCCACCTTCCAGCAGATGT-3'     | 5'-AGCTCATAACAGTCCGCCTAGA-3'    |
| INS            | 5'-CTCCTGCTTGAGAACGTGGT-3'      | 5'-GTGCTCTGCTCACACTTCCT-3'      |
| IRS-1          | 5'-TAGGCAGCAATGAGGGCAAC-3'      | 5'-GGTCATTTAGGTCTTCATTCTGCT-3'  |
| PI3K           | 5'-AGACACCATTACAAAGAAAGCCG-3'   | 5'-TTTCATTCACTTCTTCCCTTGAGA-3'  |
| AKT-1          | 5'-ACTCATTCCAGACCCACGAC-3'      | 5'-CCGGTACACCACGTTCTTCT-3'      |
| SREBP-1c       | 5'-ACTTTTCCTTAACGTGGGCCT-3'     | 5'-TGAGCTGGAGCATGTCTTCG-3'      |
| FAS            | 5'-GTGACCGCCATCTATATCG -3'      | 5'-TGCTGTCGTCTGTAGTCT-3'        |
