# Supplementary material for: Ameliorating Effect on Glycolipid Metabolism of Spirulina Functional Formulation Combination from Traditional Chinese Medicine
Source: Hindawi journal article supplement (doi:10.1155/2022/3910116), 2022-01-01
Supplement: f1 [file 3910116.f1.zip]

Table S2 Representative MS fragments of major compounds of SGC.

| Name                      | mz       | Formula                                                       | KEGG   | Type               | Class                            |
|---------------------------|----------|---------------------------------------------------------------|--------|--------------------|----------------------------------|
| gamma-Aminobutyric acid   | 104.1079 | C <sub>4</sub> H <sub>9</sub> NO <sub>2</sub>                 | C00334 | [M+H] <sup>+</sup> | Carboxylic acids and derivatives |
| Adenosine                 | 268.1039 | C <sub>10</sub> H <sub>13</sub> N <sub>5</sub> O <sub>4</sub> | C00212 | [M+H] <sup>+</sup> | Purine nucleosides               |
| Phytosphingosine          | 318.2994 | C <sub>18</sub> H <sub>39</sub> NO <sub>3</sub>               | C12144 | [M+H] <sup>+</sup> | Organonitrogen compounds         |
| Glycerophosphocholine     | 258.1109 | C <sub>8</sub> H <sub>21</sub> NO <sub>6</sub> P              | C00670 | [M] <sup>+</sup>   | Glycerophospholipids             |
| Alanyl-Tyrosine           | 253.1180 | C <sub>12</sub> H <sub>16</sub> N <sub>2</sub> O <sub>4</sub> | NULL   | [M+H] <sup>+</sup> | Carboxylic acids and derivatives |
| L-Phenylalanine           | 164.0705 | C <sub>9</sub> H <sub>11</sub> NO <sub>2</sub>                | C00079 | [M-H] <sup>-</sup> | NULL                             |
| Niacinamide               | 123.0559 | C <sub>6</sub> H <sub>6</sub> N <sub>2</sub> O                | C00153 | [M+H] <sup>+</sup> | Pyridines and derivatives        |
| L-Threonine               | 120.0658 | C <sub>4</sub> H <sub>9</sub> NO <sub>3</sub>                 | C00188 | [M+H] <sup>+</sup> | Carboxylic acids and derivatives |
| L-Lysine                  | 147.0771 | C <sub>6</sub> H <sub>14</sub> N <sub>2</sub> O <sub>2</sub>  | C00047 | [M+H] <sup>+</sup> | Carboxylic acids and derivatives |
| Pyrrole-2-carboxylic acid | 111.0206 | C <sub>5</sub> H <sub>5</sub> NO <sub>2</sub>                 | C05942 | [M] <sup>+</sup>   | Pyrroles                         |
