# Supplementary figures and images for: Ameliorating Effect on Glycolipid Metabolism of Spirulina Functional Formulation Combination from Traditional Chinese Medicine
Source: Hindawi journal article supplement (doi:10.1155/2022/3910116), 2022-01-01

# PCA Analysis

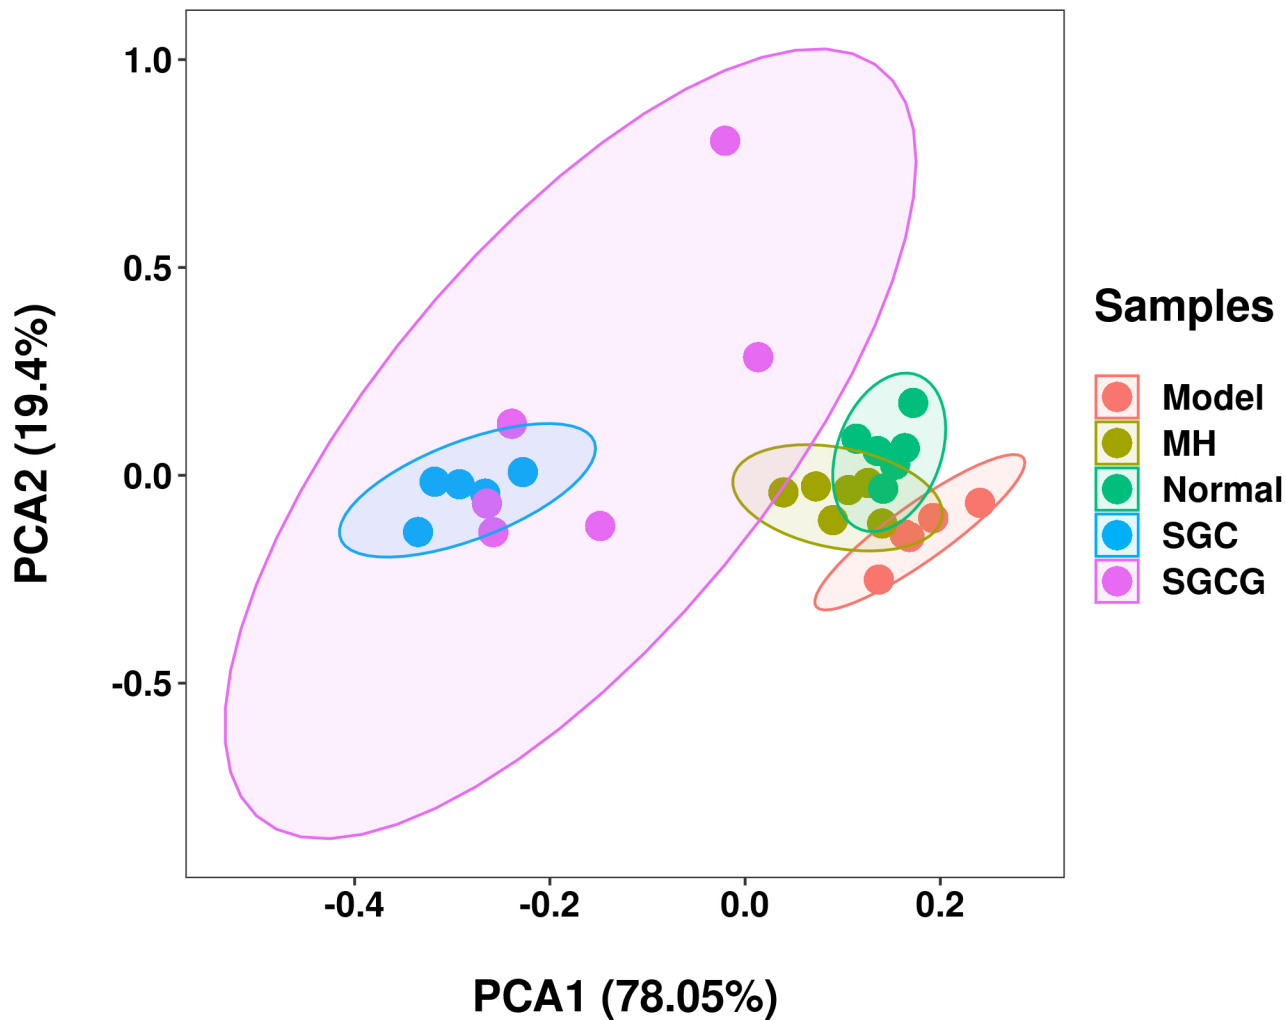

Supplement: f1 [file 3910116.f1.zip]
